# Supplementary material for: Genomic transfers help to decipher the ancient evolution of filoviruses and interactions with vertebrate hosts
Source: PubMed Central journal article supplement (PMC11398700; doi:10.1371/journal.ppat.1011864), 2024-09-03
Supplement: ppat.1011864.s005.pdf [file ppat.1011864.s005.pdf]

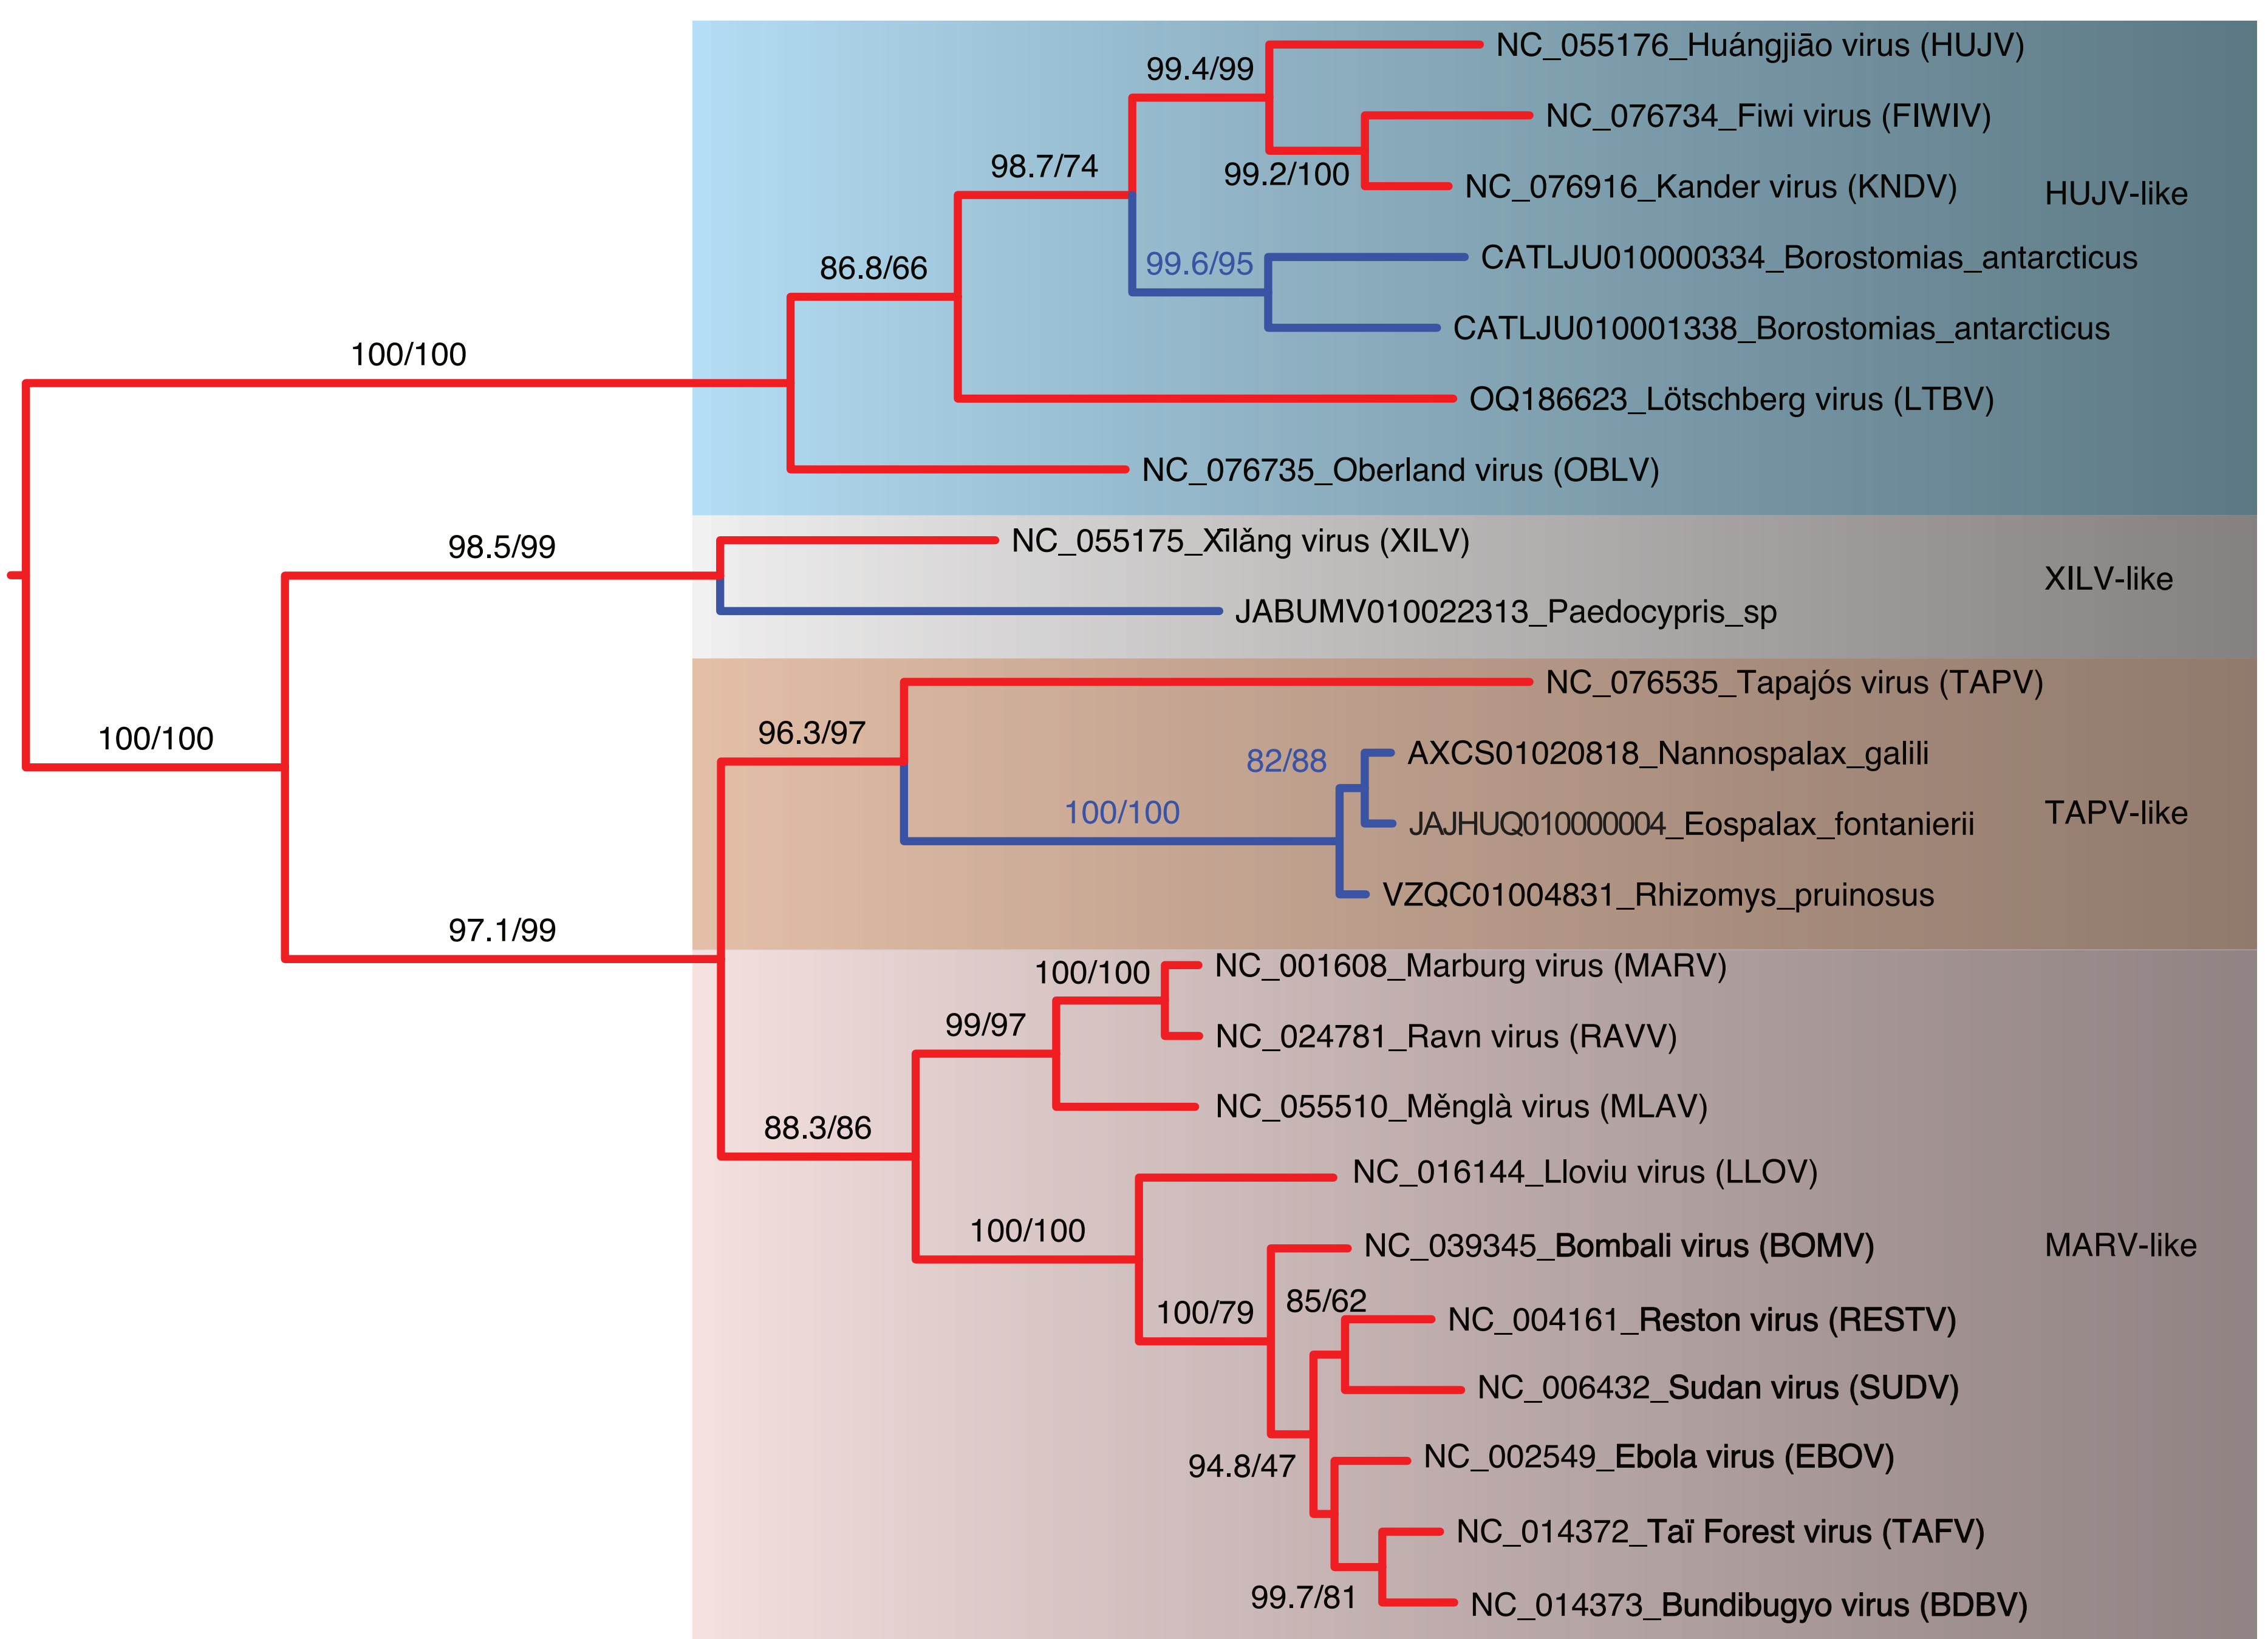

0.4
