# Supplementary material for: Genomic transfers help to decipher the ancient evolution of filoviruses and interactions with vertebrate hosts
Source: PubMed Central journal article supplement (PMC11398700; doi:10.1371/journal.ppat.1011864), 2024-09-03
Supplement: ppat.1011864.s010.pdf [file ppat.1011864.s010.pdf]

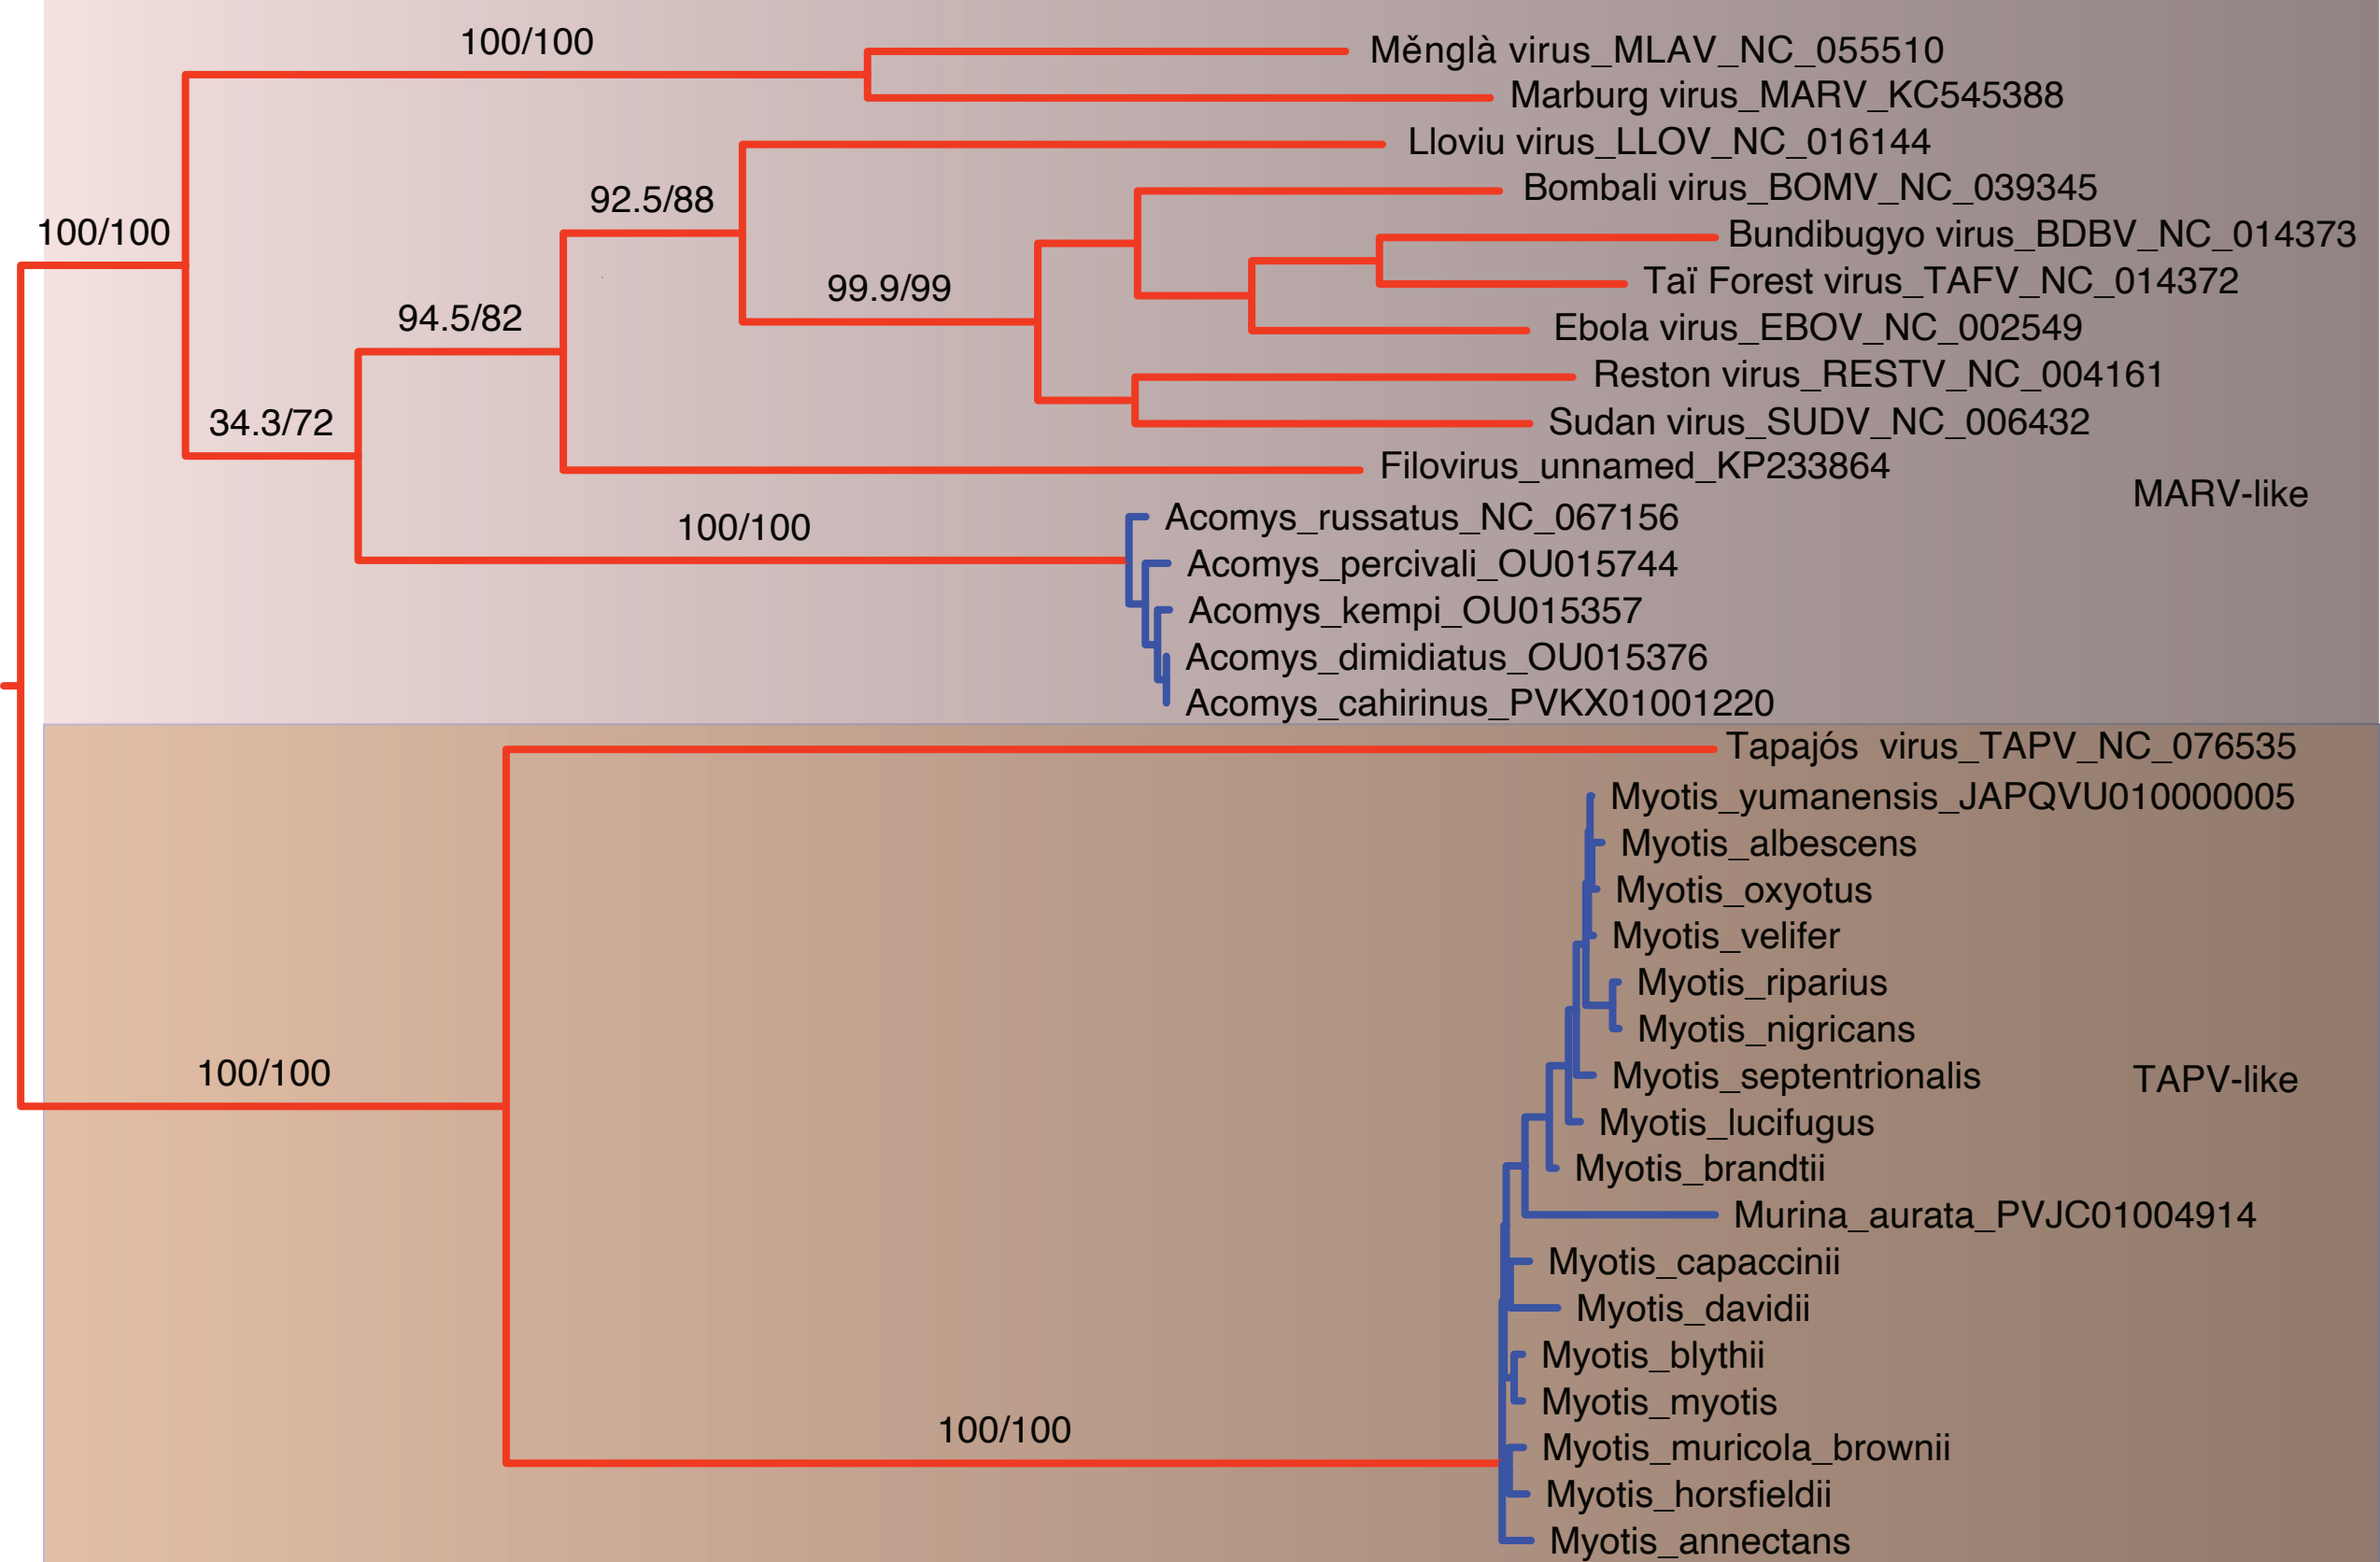

100/100

100/100

92.5/88

94.5/82

99.9/99

34.3/72

100/100

100/100

100/100

MARV-like

TAPV-like

0.3
