# Supplementary material for: Genomic transfers help to decipher the ancient evolution of filoviruses and interactions with vertebrate hosts
Source: PubMed Central journal article supplement (PMC11398700; doi:10.1371/journal.ppat.1011864), 2024-09-03
Supplement: ppat.1011864.s014.pdf [file ppat.1011864.s014.pdf]

*Murina aurata*  
PVJC01004914

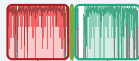

← EBOV VP35-like elements  
42842-43747

*Myotis lucifugus*  
NW\_005871048

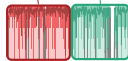

  
TRIM36

  
50 kbp

  
12239113-1344684

  
KCNN2
