# Supplementary material for: Genomic transfers help to decipher the ancient evolution of filoviruses and interactions with vertebrate hosts
Source: PubMed Central journal article supplement (PMC11398700; doi:10.1371/journal.ppat.1011864), 2024-09-03
Supplement: ppat.1011864.s015.pdf [file ppat.1011864.s015.pdf]

3,100 K 3,200 K 3,300 K 3,400 K 3,500 K 3,600 K 3,700 K 3,800 K 3,900 K 4 M 4,100 K 4,200 K 4,300 K 4,400 K 4,500 K 4,600 K

← EBOV NP-like element (ORF)

Genes, NCBI Nannospalax galili Annotation Release 102, 2019-07-02 NW\_008331125.1

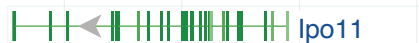

Ipo11

LOC1...

exon

LOC115068124

XR\_003847503.1

XP\_029413762.1

Zswim6

XM\_029557902.1

Dimt1

LOC10...

exon

LOC115068213

XR\_003847586.1

LOC103...

exon

LOC1...

exon

LOC1037...

exon

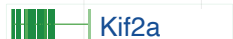

Kif2a

LOC10...

exon

H

Smim15

XR\_03847504.1

Lrrc70

XP\_029413740.1 XM\_029557880.1

LOC115068202

XR\_003847578.1
