# Supplementary material for: Genomic transfers help to decipher the ancient evolution of filoviruses and interactions with vertebrate hosts
Source: PubMed Central journal article supplement (PMC11398700; doi:10.1371/journal.ppat.1011864), 2024-09-03

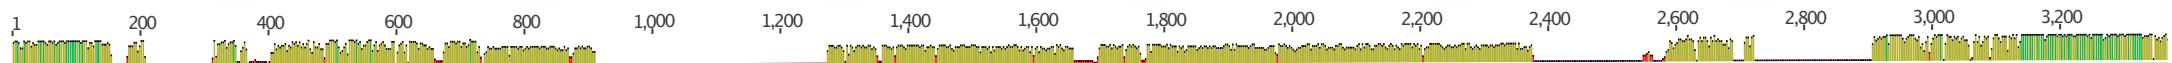

- Rattus\_norvegicus\_NC\_051339
- Mus\_musculus\_NC\_000072
- Acomys\_cahirinus\_JAULSH010000003
- Sigmodon\_hispidus\_PVIH01001137
- Mesocricetus\_auratus\_APMT01108001
- Cricetulus\_griseus\_APMK01059870
- Phodopus\_roborevskii\_CALSGD010001555
- Phodopus\_sungorus\_JAQIY010002948
- Microtus\_ochrogaster\_AHZW01161700
- Microtus\_agrestis\_CADCXT010004583
- Microtus\_arvalis\_VIIT010002543
- Neodon\_shergylaensis\_JABTXL010003188
- Microtus\_oeconomus\_VIIU01009432
- Microtus\_fortis\_NMRL01000081
- Microtus\_oregoni\_JAGKIF010000492
- Microtus\_californicus\_JAQZG010000001
- M\_richardsoni\_JAEPQW010000324\_with\_RAS\_insert
- Chionomys\_nivalis\_CATLKP010000469
- Ellobius\_talpinus\_LOJH01000262
- Ellobius\_lutescens\_LOJG01003938
- Myodes\_glareolus\_CDCXQ010040642
- Ondatra\_zibethicus\_PVIU01006931
- Dicrostonyx\_torquatus\_JAQHUG010000128
- Arvicola\_amphibius\_CAJEUE010000781

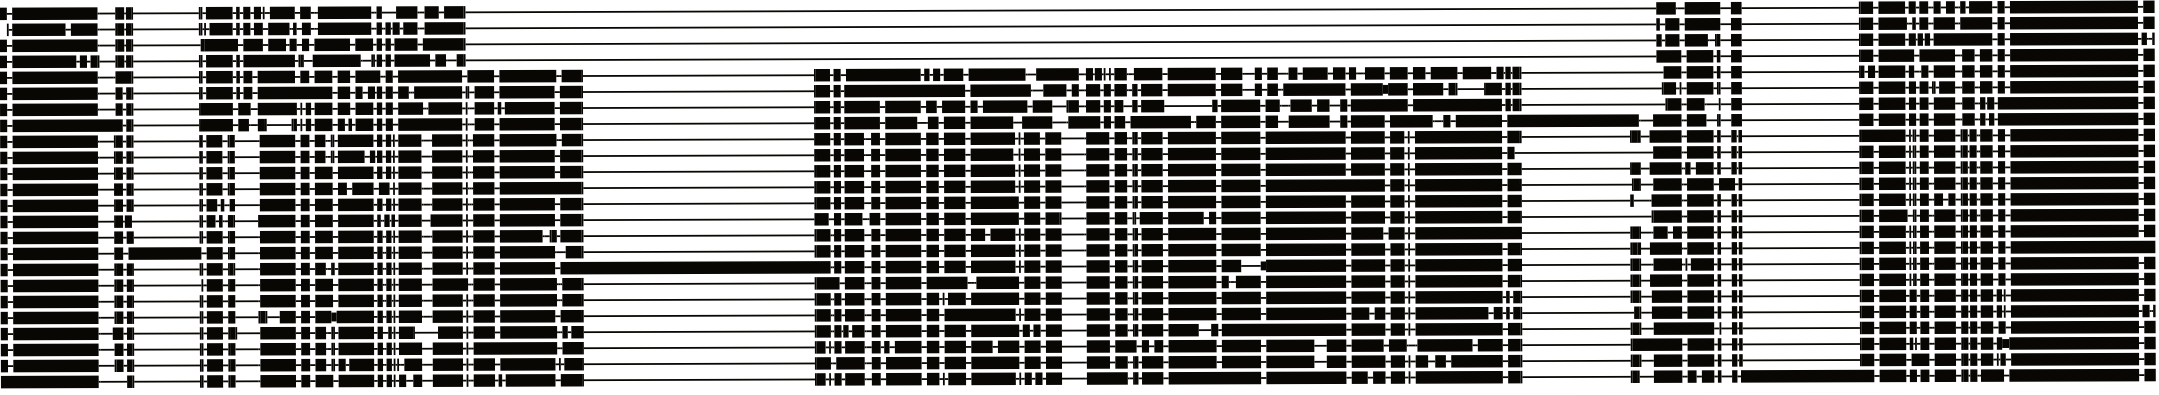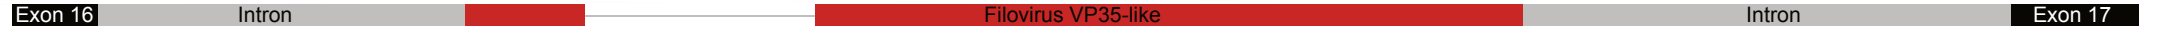

Supplement: ppat.1011864.s017.pdf [file ppat.1011864.s017.pdf]
