# Supplementary material for: Genomic transfers help to decipher the ancient evolution of filoviruses and interactions with vertebrate hosts
Source: PubMed Central journal article supplement (PMC11398700; doi:10.1371/journal.ppat.1011864), 2024-09-03
Supplement: ppat.1011864.s021.pdf [file ppat.1011864.s021.pdf]

|  | Taxon                                         | Chi2 Composition test          | p-value                       |  |
|--|-----------------------------------------------|--------------------------------|-------------------------------|--|
|  | 1 NC_076535_Tapajovirus_TAPV                  | passed                         | 94.21%                        |  |
|  | 2 Bundibugyo_ebolavirus                       | passed                         | 66.35%                        |  |
|  | 3 NC_016144_Lloviucuevirus                    | passed                         | 94.15%                        |  |
|  | 4 NC_014372TaiForestebolavirus                | passed                         | 50.62%                        |  |
|  | 5 NC_004161Restonebolavirus                   | passed                         | 41.00%                        |  |
|  | 6 NC_039345Bombalibolavirus                   | passed                         | 86.82%                        |  |
|  | 7 NC_002549Zaireebolavirus                    | passed                         | 69.51%                        |  |
|  | 8 NC_006432Sudanebolavirus                    | passed                         | 88.06%                        |  |
|  | 9 NC_055510Mengladianlovirus                  | failed                         | 0.00%                         |  |
|  | 10 NC_001608Marburgmarburgvirus               | failed                         | 1.26%                         |  |
|  | 11 NC_024781MarburgmarburgvirusRavn           | passed                         | 13.43%                        |  |
|  | 12 NC_055175Wenlingfrogfishfilovirus_XILV     | failed                         | 0.37%                         |  |
|  | 13 NC_076735Oberlandvirus                     | failed                         | 0.12%                         |  |
|  | 14 NC_055176Wenlingthamnaconusseptentrionalis | failed                         | 0.01%                         |  |
|  | 15 NC_076734_Fiwi_virus                       | failed                         | 0.00%                         |  |
|  | 16 NC_076916_Kander_virus                     | failed                         | 0.00%                         |  |
|  | ** TOTAL                                      | 7 sequences failed composition | chi2 test (p-value<5%; df=19) |  |
|  |                                               |                                |                               |  |
|  |                                               |                                |                               |  |
|  |                                               |                                |                               |  |
|  |                                               |                                |                               |  |
