# Supplementary material for: Genomic transfers help to decipher the ancient evolution of filoviruses and interactions with vertebrate hosts
Source: PubMed Central journal article supplement (PMC11398700; doi:10.1371/journal.ppat.1011864), 2024-09-03
Supplement: ppat.1011864.s022.pdf [file ppat.1011864.s022.pdf]

| SRA Run    | Reads      | Reads mapped | Infection | strain | RPM              |
|------------|------------|--------------|-----------|--------|------------------|
| SRR9003809 | 50,190,359 | 7,423        | MA_EBOV   | CC041  | 147.89692976693  |
| SRR9003810 | 91,867,558 | 12,952       | MA_EBOV   | CC041  | 140.985569682825 |
| SRR9003811 | 42,809,576 | 6,669        | MA_EBOV   | CC041  | 155.782902404826 |
| SRR9003847 | 53,127,601 | 4,245        | MA_EBOV   | CC055  | 79.9019703524727 |
| SRR9003848 | 47,882,608 | 5,443        | MA_EBOV   | CC055  | 113.67384165875  |
| SRR9003849 | 44,043,826 | 4,981        | MA_EBOV   | CC055  | 113.091900780827 |
| SRR9003634 | 36,449,655 | 3,455        | MA_EBOV   | CC042  | 94.7882771455587 |
| SRR9003635 | 41,613,949 | 5,779        | MA_EBOV   | CC042  | 138.871703812585 |
| SRR9003636 | 40,384,045 | 5,163        | MA_EBOV   | CC042  | 127.847519979735 |
| SRR9003670 | 48,133,169 | 4,257        | MA_EBOV   | CC043  | 88.4421302075498 |
| SRR9003671 | 49,671,167 | 6,652        | MA_EBOV   | CC043  | 133.920751247902 |
| SRR9003672 | 47,287,563 | 8,025        | MA_EBOV   | CC043  | 169.706355982016 |
| SRR9003818 | 46,919,565 | 3,723        | mock      | CC041  | 79.3485617353869 |
| SRR9003819 | 48,712,590 | 3,143        | mock      | CC041  | 64.5213075305583 |
| SRR9003820 | 44,458,762 | 3,109        | mock      | CC041  | 69.9299724090383 |
| SRR9003823 | 44,684,949 | 3,031        | mock      | CC041  | 67.8304455489028 |
| SRR9003824 | 39,731,958 | 2,454        | mock      | CC041  | 61.7638828672878 |
| SRR9003856 | 48,143,732 | 4,474        | mock      | CC055  | 92.9300620068257 |
| SRR9003857 | 47,757,596 | 3,709        | mock      | CC055  | 77.6630381479001 |
| SRR9003616 | 38,580,385 | 4,129        | mock      | CC042  | 107.023296942216 |
| SRR9003617 | 46,544,832 | 4,220        | mock      | CC042  | 90.6652751480551 |
| SRR9003618 | 39,403,529 | 4,188        | mock      | CC042  | 106.284896461939 |
| SRR9003652 | 38,123,229 | 3,020        | mock      | CC043  | 79.2167945690015 |
| SRR9003653 | 39,731,898 | 2,328        | mock      | CC043  | 58.5927          |
| SRR9003654 | 46,381,898 | 2,424        | mock      | CC043  | 52.26176815      |
