# Supplementary material for: Genomic transfers help to decipher the ancient evolution of filoviruses and interactions with vertebrate hosts
Source: PubMed Central journal article supplement (PMC11398700; doi:10.1371/journal.ppat.1011864), 2024-09-03
Supplement: ppat.1011864.s023.pdf [file ppat.1011864.s023.pdf]

|                 | EBO<br>V | Myoti<br>s<br>myoti<br>s | TAP<br>V | Nannosp<br>ax | Paedocyp<br>ris | Peromysc<br>us | MAR<br>V | MLA<br>V | Acomys<br>russat<br>us | Phalang<br>er | BOM<br>V | Rhizom<br>ys | LLO<br>V | XILV  | BDB<br>V | SUD<br>V | TAF<br>V | REST<br>V |
|-----------------|----------|--------------------------|----------|---------------|-----------------|----------------|----------|----------|------------------------|---------------|----------|--------------|----------|-------|----------|----------|----------|-----------|
| EBOV            |          |                          |          |               |                 |                |          |          |                        |               |          |              |          |       |          |          |          |           |
| Myotis_myotis   | 0.958    |                          |          |               |                 |                |          |          |                        |               |          |              |          |       |          |          |          |           |
| TAPV            | 1.040    | 0.881                    |          |               |                 |                |          |          |                        |               |          |              |          |       |          |          |          |           |
| Nannospalax     | 0.857    | 0.642                    | 0.916    |               |                 |                |          |          |                        |               |          |              |          |       |          |          |          |           |
| Paedocypris     | 1.427    | 1.168                    | 1.236    | 1.217         |                 |                |          |          |                        |               |          |              |          |       |          |          |          |           |
| Peromyscus      | 0.408    | 0.943                    | 0.812    | 0.701         | 1.061           |                |          |          |                        |               |          |              |          |       |          |          |          |           |
| MARV            | 0.444    | 0.549                    | 0.836    | 0.787         | 1.109           | 0.549          |          |          |                        |               |          |              |          |       |          |          |          |           |
| MLAV            | 0.305    | 0.860                    | 0.891    | 0.665         | 1.116           | 0.453          | 0.191    |          |                        |               |          |              |          |       |          |          |          |           |
| Acomys russatus | 0.446    | 1.029                    | 0.969    | 0.692         | 1.094           | 0.453          | 0.585    | 0.517    |                        |               |          |              |          |       |          |          |          |           |
| Phalanger       | 0.785    | 1.258                    | 1.341    | 1.136         | 2.269           | 0.844          | 0.791    | 0.797    | 0.924                  |               |          |              |          |       |          |          |          |           |
| BOMV            | 0.045    | 0.945                    | 1.069    | 0.843         | 1.230           | 0.408          | 0.440    | 0.314    | 0.462                  | 0.784         |          |              |          |       |          |          |          |           |
| Rhizomys        | 1.011    | 0.809                    | 1.121    | 0.434         | 1.025           | 0.794          | 0.878    | 0.835    | 0.897                  | 1.202         | 0.967    |              |          |       |          |          |          |           |
| LLOV            | 0.293    | 0.889                    | 0.971    | 0.825         | 1.304           | 0.466          | 0.352    | 0.308    | 0.54                   | 0.707         | 0.305    | 1.025        |          |       |          |          |          |           |
| XILV            | 1.617    | 1.458                    | 1.587    | 1.228         | 0.615           | 1.184          | 1.432    | 1.486    | 1.406                  | 2.028         | 1.271    | 1.227        | 1.369    |       |          |          |          |           |
| BDBV            | 0.059    | 0.914                    | 1.034    | 0.839         | 1.484           | 0.406          | 0.466    | 0.312    | 0.428                  | 0.773         | 0.065    | 1.015        | 0.281    | 1.342 |          |          |          |           |
| SUDV            | 0.056    | 0.972                    | 1.105    | 0.854         | 1.515           | 0.405          | 0.456    | 0.307    | 0.458                  | 0.793         | 0.056    | 1.009        | 0.301    | 1.529 | 0.059    |          |          |           |
| TAFV            | 0.063    | 0.926                    | 1.030    | 0.833         | 1.488           | 0.402          | 0.463    | 0.300    | 0.448                  | 0.788         | 0.065    | 1.022        | 0.280    | 1.263 | 0.038    | 0.058    |          |           |
| RESTV           | 0.077    | 0.893                    | 1.028    | 0.850         | 1.211           | 0.392          | 0.449    | 0.288    | 0.443                  | 0.777         | 0.067    | 1.008        | 0.288    | 1.538 | 0.063    | 0.054    | 0.064    |           |
