# Supplementary material for: Genomic transfers help to decipher the ancient evolution of filoviruses and interactions with vertebrate hosts
Source: PubMed Central journal article supplement (PMC11398700; doi:10.1371/journal.ppat.1011864), 2024-09-03
Supplement: ppat.1011864.s024.pdf [file ppat.1011864.s024.pdf]

|                 |        |             |        |             |        |        |        |                 |             |          |        |       |        |       |       |       |       |
|-----------------|--------|-------------|--------|-------------|--------|--------|--------|-----------------|-------------|----------|--------|-------|--------|-------|-------|-------|-------|
|                 | EBOV   | Myotis luc. | TAPV   | Myotis capp | RAVN   | MARV   | MLAV   | Acomys russatus | Trichosurus | Phodopus | Myo_ox | LLOV  | Murina | BDBV  | SUDV  | TAFV  | RESTV |
| EBOV            |        |             |        |             |        |        |        |                 |             |          |        |       |        |       |       |       |       |
| Myotis luc.     | 1.685  |             |        |             |        |        |        |                 |             |          |        |       |        |       |       |       |       |
| TAPV            | 4.211  | 2.794       |        |             |        |        |        |                 |             |          |        |       |        |       |       |       |       |
| Myotis capp     | 3.537  | 1.087       | 2.666  |             |        |        |        |                 |             |          |        |       |        |       |       |       |       |
| RAVN            | 1.454  | 2.453       | 7.316  | 2.402       |        |        |        |                 |             |          |        |       |        |       |       |       |       |
| MARV            | 2.946  | 1.509       | 3.277  | 1.814       | 1.034  |        |        |                 |             |          |        |       |        |       |       |       |       |
| MLAV            | 1.648  | 1.869       | 4.306  | 3.050       | 1.372  | 2.407  |        |                 |             |          |        |       |        |       |       |       |       |
| Acomys russatus | 1.436  | 1.619       | 3.536  | 2.004       | 1.040  | 1.440  | 0.861  |                 |             |          |        |       |        |       |       |       |       |
| Trichosurus     | 1.740  | 2.782       | 5.455  | 3.010       | 1.937  | 1.978  | 1.658  | 1.564           |             |          |        |       |        |       |       |       |       |
| Phodopus        | 15.733 | 12.629      | 12.513 | 14.415      | 12.135 | 11.807 | 13.476 | 12.46           | 14.039      |          |        |       |        |       |       |       |       |
| Myotis ox       | 2.372  | 1.446       | 2.978  | 2.116       | 1.769  | 1.485  | 4.979  | 4.692           | 2.936       | 12.825   |        |       |        |       |       |       |       |
| LLOV            | 0.517  | 3.580       | 3.766  | 3.329       | 1.676  | 1.934  | 1.723  | 1.096           | 1.145       | 12.694   | 4.290  |       |        |       |       |       |       |
| Murina          | 3.045  | 1.111       | 2.854  | 1.240       | 1.716  | 1.937  | 2.210  | 1.888           | 3.016       | 14.307   | 1.612  | 2.556 |        |       |       |       |       |
| BDBV            | 0.735  | 1.776       | 7.328  | 3.419       | 1.888  | 2.639  | 1.607  | 1.060           | 1.573       | 15.129   | 3.344  | 0.333 | 3.236  |       |       |       |       |
| SUDV            | 0.526  | 3.160       | 8.667  | 3.184       | 2.200  | 2.425  | 1.730  | 1.458           | 1.545       | 14.982   | 3.279  | 0.371 | 3.018  | 0.249 |       |       |       |
| TAFV            | 0.637  | 2.223       | 8.059  | 3.441       | 1.326  | 2.346  | 2.133  | 1.337           | 1.806       | 15.698   | 2.023  | 0.381 | 3.094  | 0.190 | 0.282 |       |       |
| RESTV           | 0.329  | 2.006       | 6.593  | 3.267       | 2.790  | 3.334  | 2.131  | 1.184           | 1.406       | 13.836   | 1.770  | 0.360 | 3.197  | 0.353 | 0.317 | 0.274 |       |
